# Supplementary material
Source: MDPI journal article supplement (https://www.mdpi.com/2227-9717/9/5/853)
Supplement: s1 [file s1]

## Supplementary material

**Table S1.** Plan of *Achillea atrata* L. cultivation in Germany in the years 2015 to 2019. Composition of cultivation soil I: 32% wood fibre, 64% compost and 4% sand. Composition of soil variant 1: 20 % sand, 25 % volcanic granulate, 25 % wood fibre, compost and 30 % limestone gravel. Composition of soil variant 2: 30 % sand, 35 % volcanic granulate, 35% wood fibre.

| Cultivation plan <b>2015/2016</b> |                                                                                                                                                                                                                                                                              |
|-----------------------------------|------------------------------------------------------------------------------------------------------------------------------------------------------------------------------------------------------------------------------------------------------------------------------|
| November 2015                     | Seeding of <i>A. atrata</i> in seed trays (broadcast seeding; cultivation soil I, covered with 1 mm quartz sand)                                                                                                                                                             |
| January 2016                      | Due to poor germination, <i>A. atrata</i> was reseeded (broadcast seeding, cultivation soil I, covered with 1 mm quartz sand)                                                                                                                                                |
| February 2016                     | Planting of seedlings in small pots (dimensions: 7 x 7 x 8 cm) with cultivation soil I                                                                                                                                                                                       |
| April 2016                        | Planting of seedlings in pots (dimensions: 11 x 11 x 12 cm) with 2/3 cultivation soil I and 1/3 sand                                                                                                                                                                         |
| June 2016                         | Transplanting of 20 juveniles into the field (soil variant 1)<br>Transplanting of 6 juveniles in clay pots with different substrate composition (variant 1 and 2)                                                                                                            |
| September 2016                    | Harvesting seeds from one plant in the generative phase                                                                                                                                                                                                                      |
| October 2016                      | 13 plants from the field survived and were planted in a cold frame for hibernation<br>Vegetative reproduction of the greatest plant from the clay pots (1 mother plant with 7 clones)<br>Hibernation of the remaining clay pot plants and the novel clones in the cold frame |
| Cultivation plan <b>2017</b>      |                                                                                                                                                                                                                                                                              |
|                                   | Vegetative reproduction and establishment of a stable plant population in pot cultures and in cold frames<br>Entire plant population dies off                                                                                                                                |
| Cultivation plan <b>2018</b>      |                                                                                                                                                                                                                                                                              |
| April 2018                        | Reseeding of <i>A. atrata</i> (seeds collected in 2016; broadcast seeding; cultivation soil I, covered with 1 mm quartz sand)<br>Planting of 55 seedlings in small pots with cultivation soil I                                                                              |
| June 2018                         | Planting of 51 juveniles in pots with 2/3 cultivation soil I and 1/3 sand                                                                                                                                                                                                    |
| July 2018                         | 35 juvenile plants survived and were transplanted into the field trial for hibernation (soil variant 1)                                                                                                                                                                      |
| Cultivation plan <b>2019</b>      |                                                                                                                                                                                                                                                                              |
| April 2019                        | Reseeding of <i>A. atrata</i> (seeds collected in 2016 / seeds from University Zurich; broadcast seeding; cultivation soil I, covered with 1 mm quartz sand)                                                                                                                 |
| May 2019                          | Planting of seedlings in small pots with cultivation soil I                                                                                                                                                                                                                  |

|             |                                                                                                                                  |                                                    |
|-------------|----------------------------------------------------------------------------------------------------------------------------------|----------------------------------------------------|
| June 2019   | Planting of 37 juveniles in pots with 2/3 cultivation soil I and 1/3 sand                                                        | <b>Table S2.</b><br>Plan of<br><i>Achillea at-</i> |
| July 2019   | 25 juvenile plants were transplanted into the field (soil variant 1)                                                             |                                                    |
| August 2019 | 8 plants survived, one plant reached the generative phase<br>Complete harvest of the plant population for phytochemical analyses |                                                    |

*rata* L. cultivation in Switzerland in the years 2016 to 2019. Composition of cultivation soil II: 2/3 peat-free soil consisting of bark humus and mineral structural materials and 1/3 sand. Soil composition for the field: 70% compost, 15% wood fibres, 5% clay, 5% lava granules and limestone.

| Cultivation plan 2016       |                                                                                                                                                           |
|-----------------------------|-----------------------------------------------------------------------------------------------------------------------------------------------------------|
| May 2016                    | Seeding of <i>A. atrata</i> in cold frames (broadcast seeding; cultivation soil II)                                                                       |
| June 2016                   | Planting of 8 seedlings in small pots (cultivation soil II)                                                                                               |
|                             | Reseeding of <i>A. atrata</i> in cold frames, due to poor germination                                                                                     |
| September 2016              | Planting of 19 juvenile plants in clay pots with 3/4 cultivation soil II and 1/4 sand and gravel                                                          |
| October 2016                | Transplanting of 19 juveniles into the field with a soil composition of 70% compost, 15% wood fibres, 5% clay, 5% lava granules and limestone             |
|                             | Hibernation of <i>A. atrata</i> in the field                                                                                                              |
| Cultivation plan 2017       |                                                                                                                                                           |
| May 2017                    | 14 plants survived the winter season                                                                                                                      |
| August 2017                 | 13 plants survived                                                                                                                                        |
| September 2017              | Vegetative reproduction<br>13 plants and their 78 shoots were planted in pots (dimensions: 9 x 9 x 10 cm) with cultivation soil II                        |
| October 2017                | 13 plants and 33 shoots were transplanted into the field with a soil composition of 70% compost, 15% wood fibres, 5% clay, 5% lava granules and limestone |
| Cultivation plan 2018/ 2019 |                                                                                                                                                           |
| May 2018                    | 1 plant and 4 shoots survived the winter season                                                                                                           |
| July 2018                   | Renewed seeding of <i>A. atrata</i> remained unsuccessful                                                                                                 |
| October 2018                | Hibernation of 5 plants in the field                                                                                                                      |
| August 2019                 | Harvest of all surviving plants                                                                                                                           |
